# Supplementary material for: Balancing Water Uptake and Loss through the Coordinated Regulation of Stomatal and Root Development
Source: PLoS One. 2016 Jun 8;11(6):e0156930. doi: 10.1371/journal.pone.0156930 (PMC4898744; doi:10.1371/journal.pone.0156930)
Supplement: S1 Table — (XLSX) [file pone.0156930.s004.xlsx]

## Sheet: Figure 1
All data shown below is the raw data used to create the respective graphs. Error bars presented in the study are standard errors of the respectice means.
	Concentration of phosphate (nanograms per gram)
Figure 1	Col-0	EPF2OE	epf1epf2
After substracting from blank measurements :	0.324045	0.125138	0.686903
	0.280792	0.451993	0.50807
	0.312433	0.0778437	0.426401
	0.375469	0.356626	1.14322
	0.295475	0.158392	0.668208

## Sheet: Figure 2
Figure 2 (c)						(d)				(e)
						Root hair length (mm)					Root hair density (mm2)
	genotype	Stomatal Density		Root area (cm2)		EPF2 OE	Col-0	epf1epf2		EPF2 OE	Col-0	epf1epf2
	col-0	192.889		4.247		0.262	0.337	0.234		24	10	21
	col-0	144.667		6.376		0.417	0.26	0.18		27	22	21
	col-0	152.445		11.05		0.608	0.203	0.23		12	15	26
	col-0	135.333		10.995		0.536	0.227	0.31		23	17	19
	col-0	166.445		8.62		0.288	0.241	0.263		18	18	20
	col-0	158.667		9.649		0.333	0.219	0.347		15	21	23
	col-0	149.333		3.752		0.427	0.245	0.29		23	27	29
	epf1epf2	298.667		12.018		0.245	0.213	0.226		16	23	21
	epf1epf2	292.445		6.11		0.167	0.215	0.219		24	18	24
	epf1epf2	284.667		6.945		0.584	0.225	0.257		18	26	25
	epf1epf2	311.111		12.11		0.309	0.56	0.38		20	17	19
	epf1epf2	247.333		6.945		0.358	0.632	0.471		14	22	23
	epf1epf2	315.778		6.516		0.429	0.552	0.35		13	25	21
	epf1epf2	315.778		10.406		0.417	0.593	0.516		19	26	24
	EPF2 OE	28		1.032		0.347	0.543	0.286		19	21	14
	EPF2 OE	49.7778		1.49		0.468	0.589	0.502		13	18	28
	EPF2 OE	49.7778		7.338		0.327	0.425	0.396		10	16	20
	EPF2 OE	23.3333		5.511		0.283	0.357	0.429		10	22	19
	EPF2 OE	31.1111		3.327		0.325	0.554	0.208			17
	EPF2 OE	108.889		9.741		0.597	0.354	0.334			23
	EPF2 OE	104.222		2.432		0.196	0.488	0.257			13
						0.441	0.339	0.288			13
						0.374	0.321	0.236			19
						0.159	0.235	0.576			8
						0.474	0.372	0.406			21
						0.298	0.381	0.364			24
						0.312	0.455	0.644			16
						0.322	0.179	0.322			17
						0.237	0.179	0.346			21
						0.245	0.25	0.452			19
						0.235	0.32	0.315			13
						0.23	0.364	0.425			14
						0.203	0.17	0.442			20
						0.241	0.215	0.581			20
						0.384	0.229	0.704			18
						0.451	0.374	0.546			13
						0.292	0.249	0.244			14
						0.442	0.442	0.433			17
						0.422	0.378	0.554			18
						0.591	0.272	0.427			15
						0.215	0.288	0.405			24
						0.186	0.506	0.471			16
						0.44	0.458	0.512			18
						0.442	0.448	0.336			13
						0.19	0.337	0.309
						0.381	0.514	0.369
						0.25	0.236	0.372
						0.431	0.447	0.482
						0.17	0.253	0.261
						0.322	0.357	0.417
						0.335	0.266	0.509
						0.36	0.274	0.352
						0.43	0.203	0.363
						0.245	0.229	0.389
						0.29	0.384	0.48
						0.203	0.264	0.471
						0.179	0.217	0.378
						0.131	0.204	0.396
						0.229	0.237	0.5
						0.219	0.167	0.241
						0.501	0.489	0.538
						0.321	0.494	0.491
						0.241	0.391	0.367
						0.309	0.339	0.482
						0.393	0.363	0.466
						0.17	0.331	0.423
						0.512	0.208	0.657
						0.286	0.363	0.55
						0.693	0.429	0.288
						0.378	0.274	0.358

## Sheet: Figure 3
a)
			Stomatal conductance
time (mins)			RSL4 OE				rsl4 rhd6 rsl1				col-0
0		0.225	0.229	0.241		0.26	0.288	0.302		0.236	0.238	0.274
1		0.225	0.226	0.237		0.26	0.291	0.3		0.233	0.24	0.269
2		0.226	0.224	0.234		0.26	0.285	0.301		0.23	0.236	0.27
3		0.225	0.226	0.229		0.26	0.298	0.3		0.229	0.238	0.276
4		0.224	0.225	0.228		0.26	0.311	0.302		0.228	0.235	0.275
5		0.225	0.225	0.225		0.259	0.302	0.302		0.225	0.233	0.272
6		0.223	0.224	0.226		0.265	0.304	0.301		0.224	0.236	0.273
7		0.224	0.222	0.219		0.264	0.306	0.302		0.224	0.238	0.27
8		0.222	0.223	0.222		0.268	0.301	0.302		0.222	0.237	0.271
9		0.223	0.223	0.218		0.264	0.302	0.308		0.219	0.239	0.27
10		0.223	0.224	0.219		0.269	0.306	0.301		0.222	0.24	0.269
11		0.224	0.225	0.219		0.27	0.298	0.3		0.221	0.241	0.266
12		0.223	0.225	0.219		0.271	0.3	0.301		0.22	0.245	0.266
13		0.223	0.225	0.218		0.267	0.305	0.302		0.219	0.242	0.265
14		0.224	0.225	0.219		0.268	0.303	0.303		0.218	0.24	0.264
15		0.222	0.226	0.218		0.266	0.303	0.298		0.218	0.24	0.263
16		0.222	0.227	0.218		0.27	0.302	0.301		0.217	0.243	0.267
17		0.222	0.228	0.218		0.27	0.301	0.3		0.219	0.238	0.264
18		0.222	0.229	0.219		0.268	0.303	0.298		0.217	0.24	0.263
19		0.223	0.23	0.22		0.269	0.301	0.302		0.217	0.241	0.265
20		0.224	0.229	0.219		0.27	0.293	0.29		0.217	0.24	0.269
b)
Stomatal density of the average of 3 leaves per plant	col-0	RSL4 OE	rsl4 rhd6 rsl1
	187	191	269
	193	187	232
	210	201	210
	199	154	208

## Sheet: Figure 4 
b)			Left axis (root length cm)														Right Axis (root length cm)
	Distance from air source	Col-0					EPF2OE					epf1epf2					Col-0					EPF2OE					epf1epf2
	1	9.8					10.5					12.5					6.595	5.9	6.2	5.34		5.9	4.01	4.573	6.428		6.3	7.25	7.2	6.74
	2	8.6					7.9					10.45
	3	7.31					5.7					8.32
	4	6.4					5.3					8.243
c)	Stomatal index (%)				Stomatal density (mm2)
	Phosphate conc			Phosphate conc
	Normal	Low			Normal	Low
	25.7587	25.465			233.536	184.804
	25.6462	24.4643			217.208	230.625
	21.7224	28.242			171.64	220.625
	25.0167	25.9596			232.397	234.919
	28.2892	27.6336			254.422	217.208
		24.6113

## Sheet: Supplementary
	Leaf area (cm2)
a)	Normal phosphate	Low phosphate
	3.6	3
	4	3.1
	3.9	3.2
	4.1	3.4
	3.8	3.1
	3.7	3
	3.5	2.9
	3.2	3.5
